# Supplementary material for: The Smallest Known Genomes of Multicellular and Toxic Cyanobacteria: Comparison, Minimal Gene Sets for Linked Traits and the Evolutionary Implications
Source: PubMed Central journal article supplement (PMC2821919; doi:10.1371/journal.pone.0009235), 2010-02-16

**A** *C. raciborskii* CS-505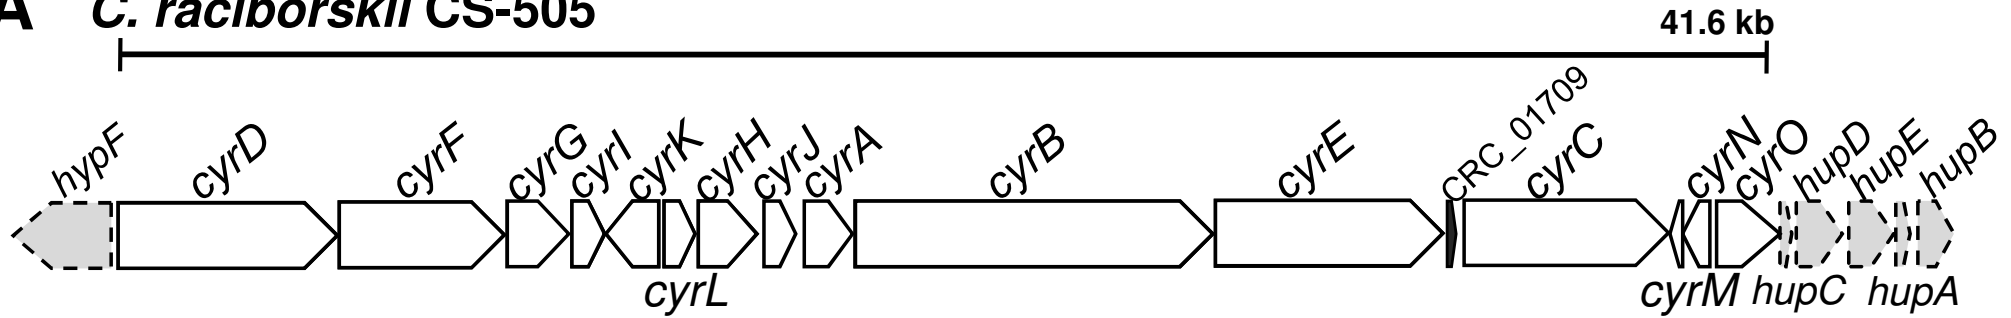*C. raciborskii* AWT205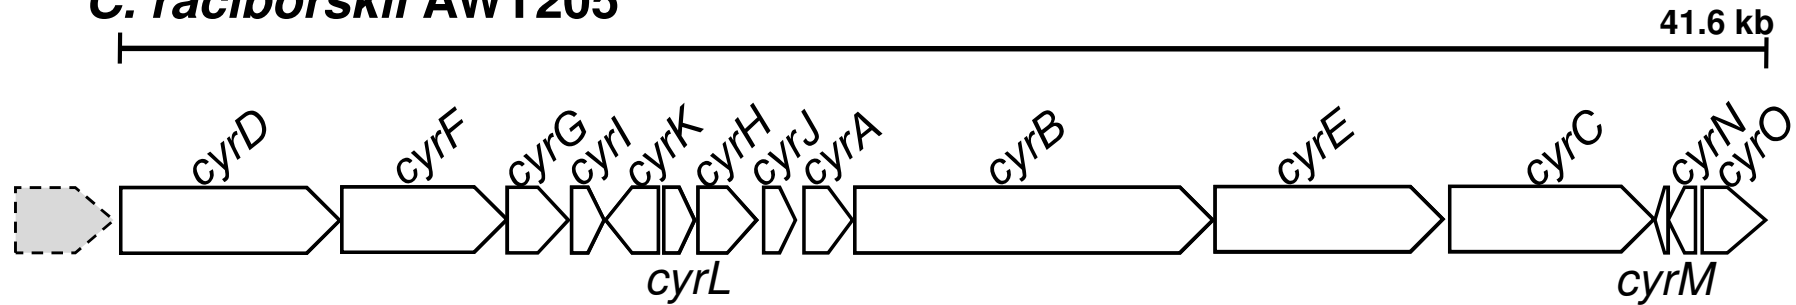**B***R. brookii* D9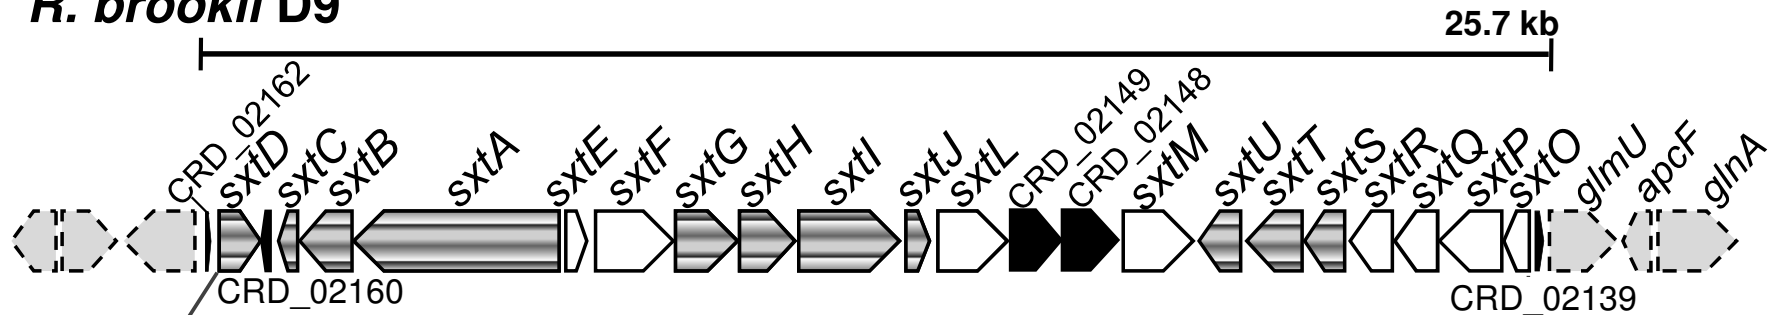*C. raciborskii* T3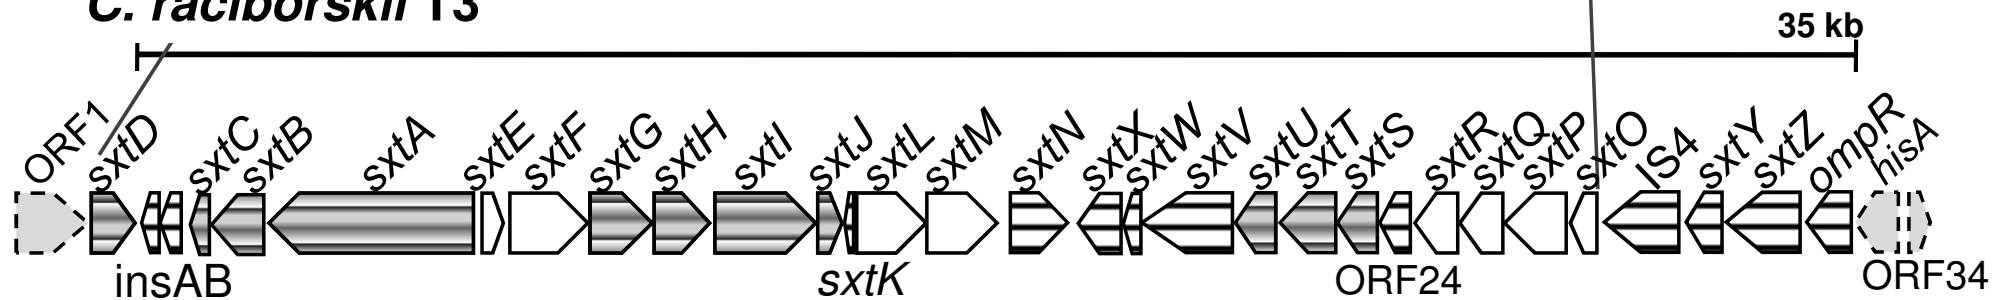

Supplement: pone.0009235.s005.pdf [file pone.0009235.s005.pdf]
