# Supplementary material for: The Smallest Known Genomes of Multicellular and Toxic Cyanobacteria: Comparison, Minimal Gene Sets for Linked Traits and the Evolutionary Implications
Source: PubMed Central journal article supplement (PMC2821919; doi:10.1371/journal.pone.0009235), 2010-02-16

CRC\_00821/CRD\_00230

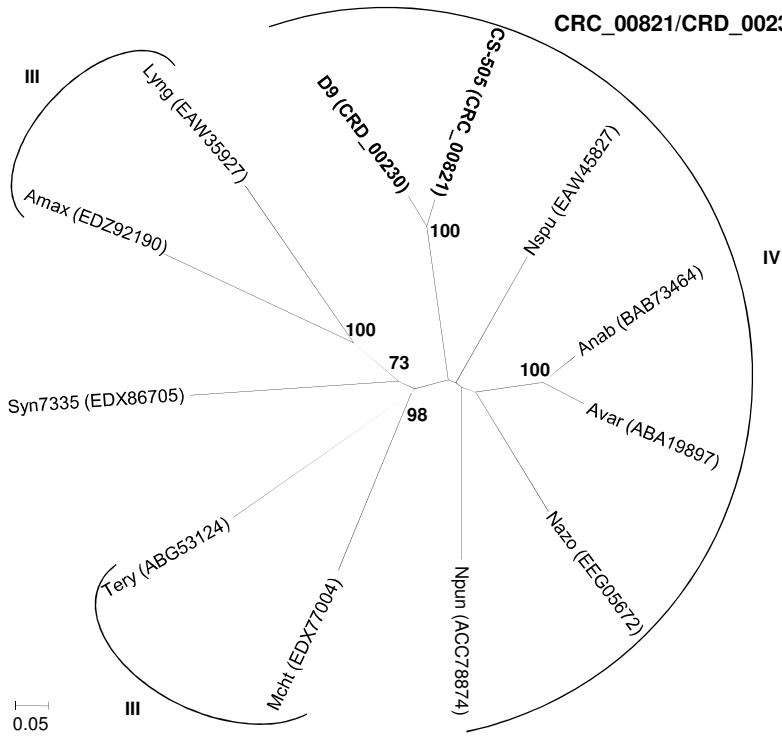

CRC\_01215/CRD\_00387

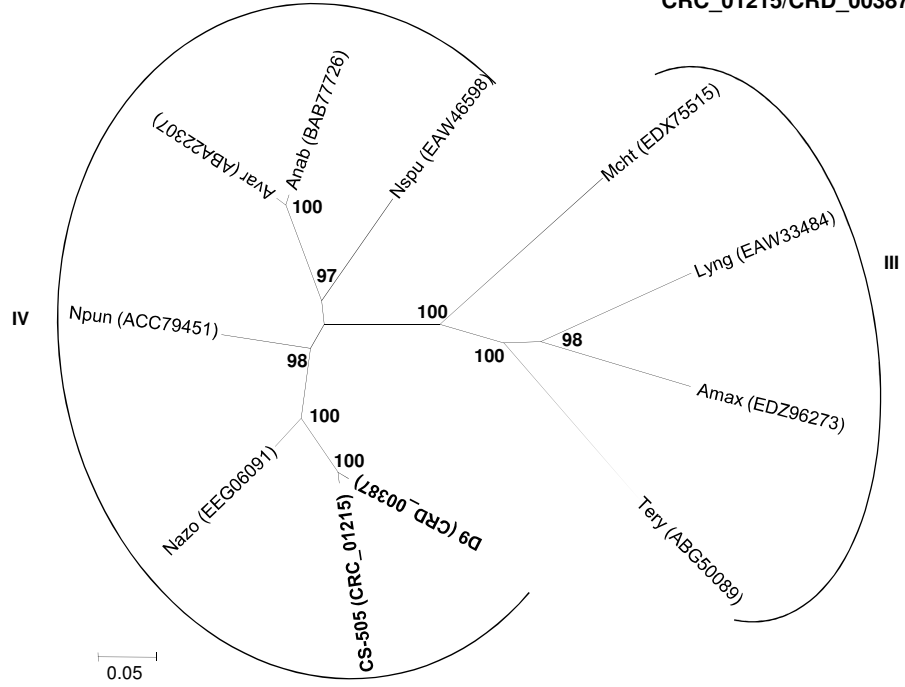

CRC\_01280/CRD\_02002

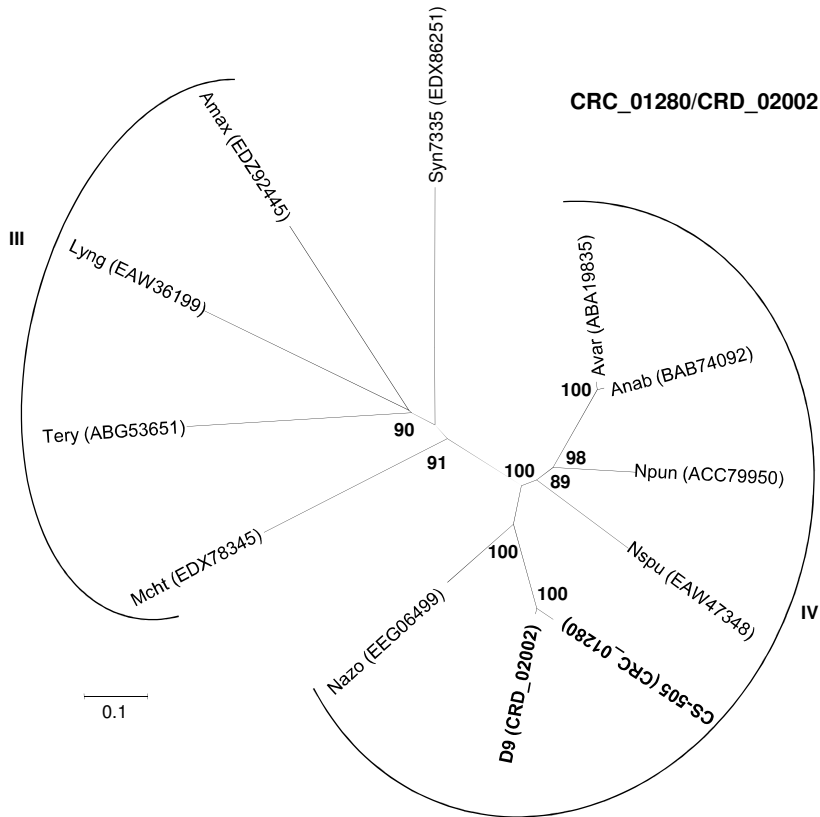

CRC\_00038/CRD\_02583

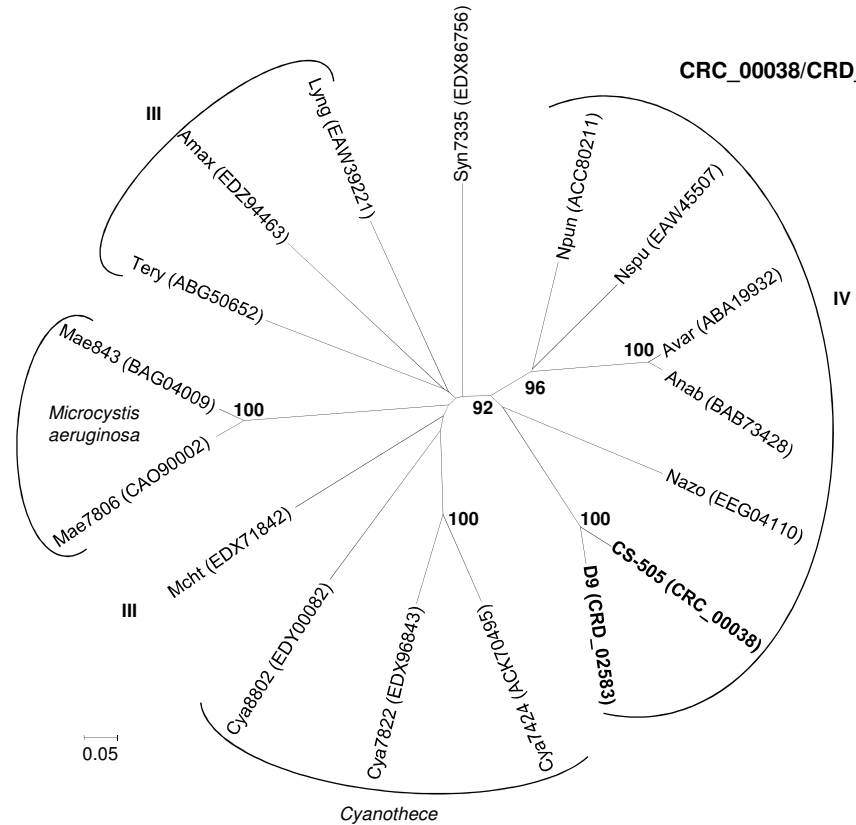

**HetR**  
CRC\_03184/CRD\_01519

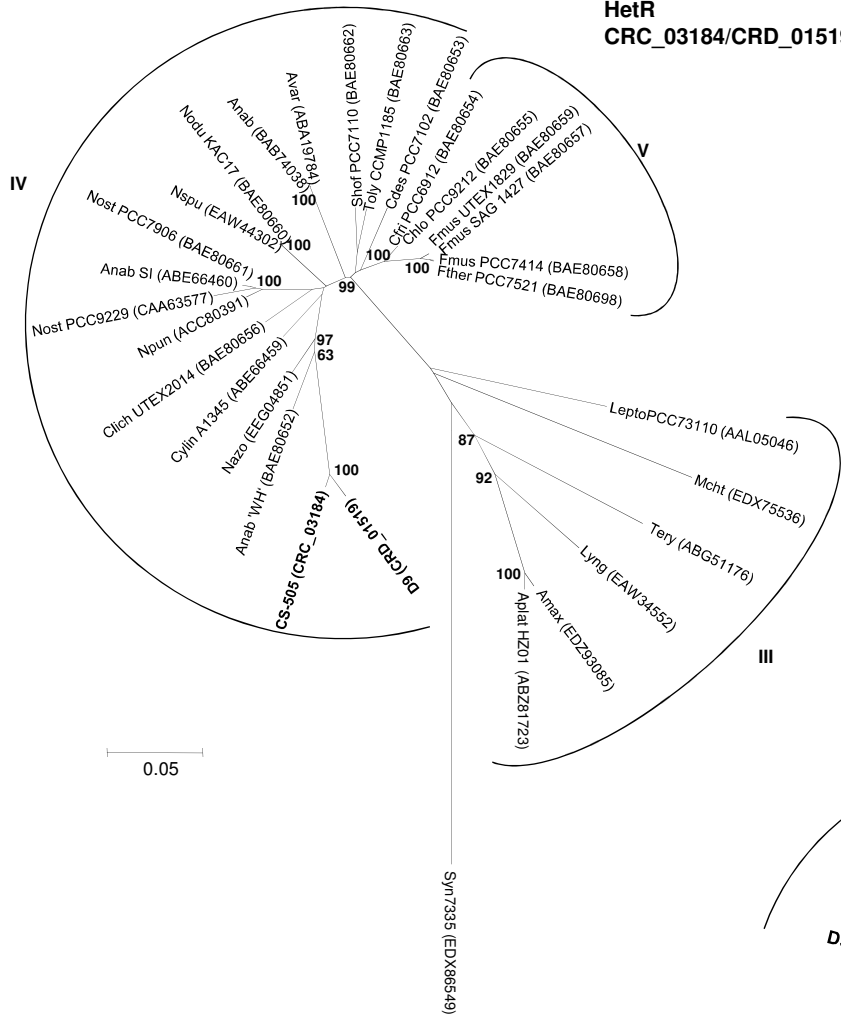

**PatU3**  
CRC\_02800/CRD\_02293

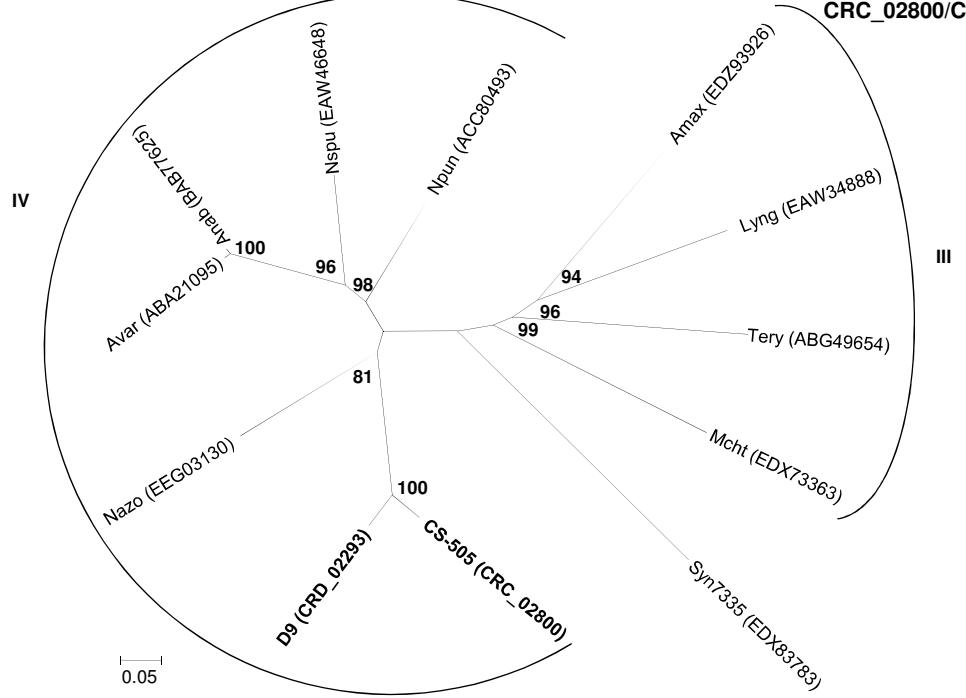

**HetZ**  
CRC\_02801/CRD\_02292

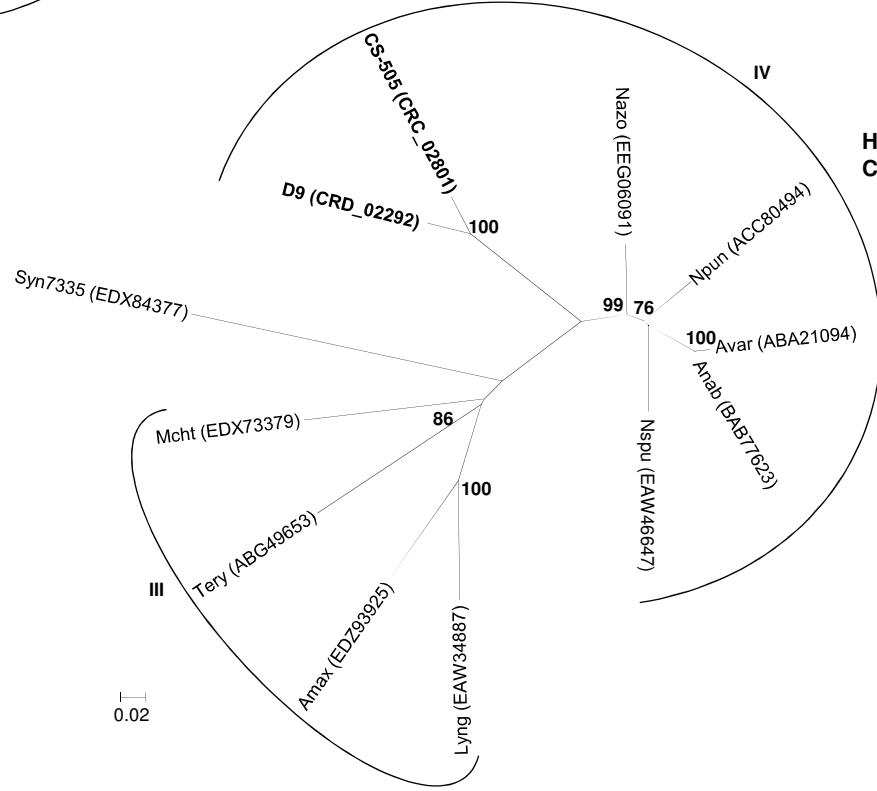

CRC\_00676/CRD\_00085

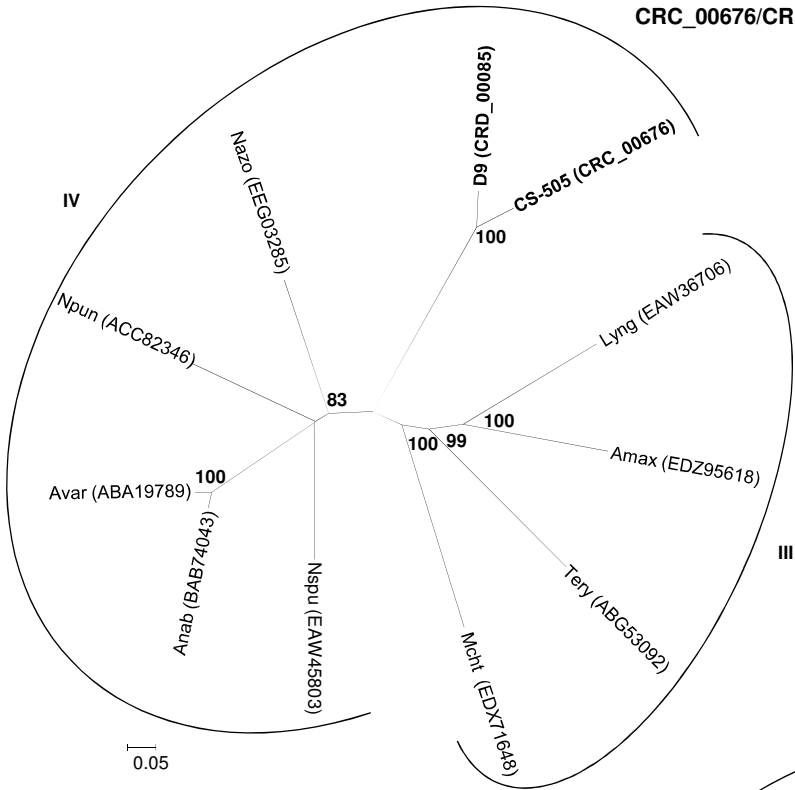

CRC\_01389/CRD\_01527

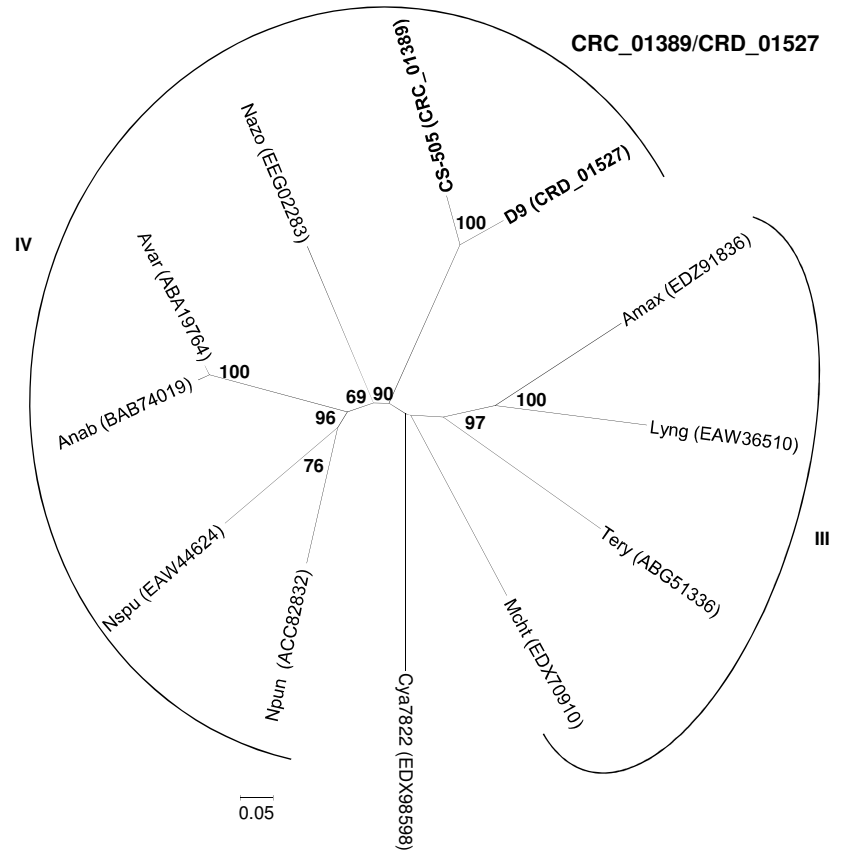

CRC\_01594/CRD\_02120

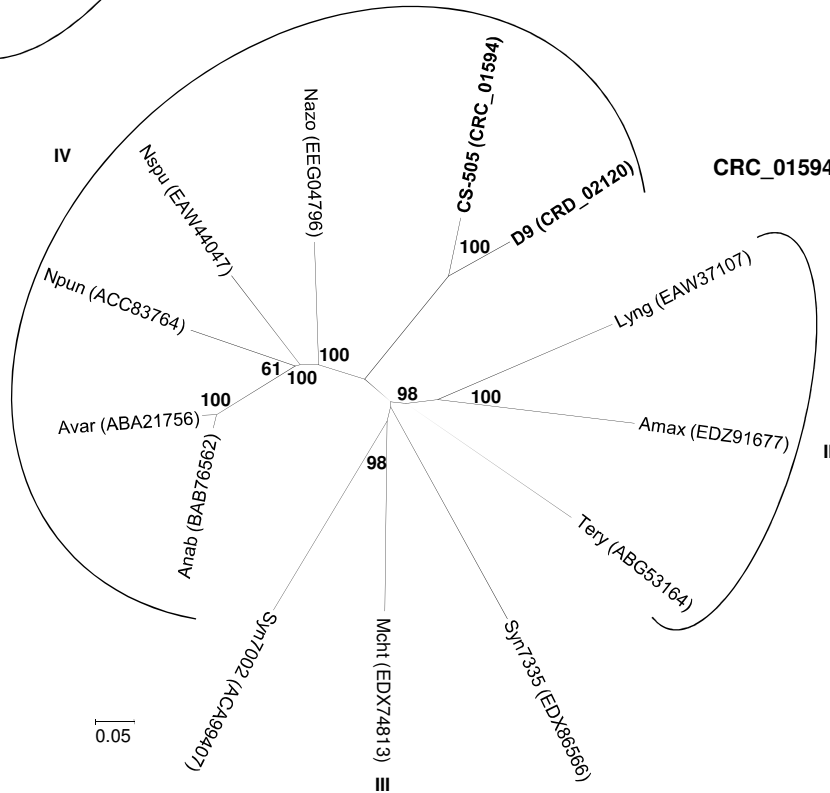

Supplement: pone.0009235.s006.pdf [file pone.0009235.s006.pdf]
