# Supplementary material for: The Smallest Known Genomes of Multicellular and Toxic Cyanobacteria: Comparison, Minimal Gene Sets for Linked Traits and the Evolutionary Implications
Source: PubMed Central journal article supplement (PMC2821919; doi:10.1371/journal.pone.0009235), 2010-02-16
Supplement: pone.0009235.s007.pdf [file pone.0009235.s007.pdf]

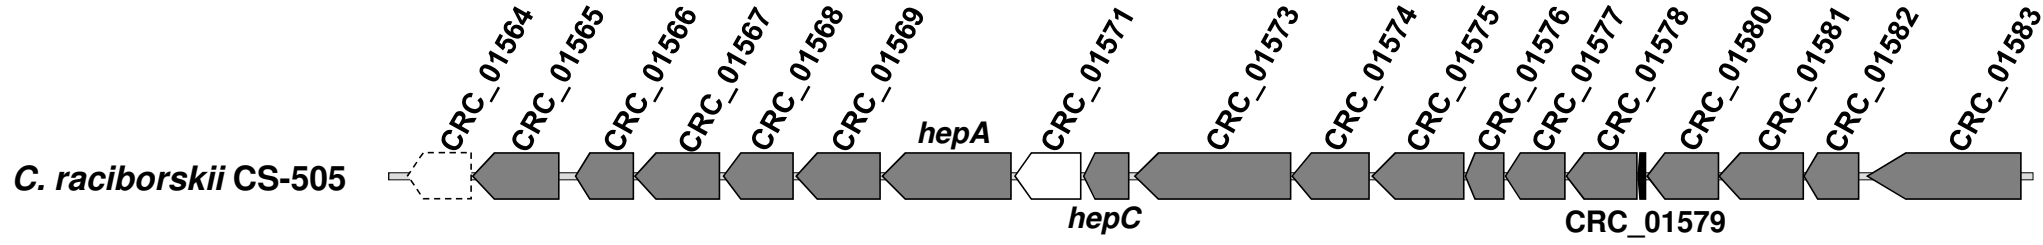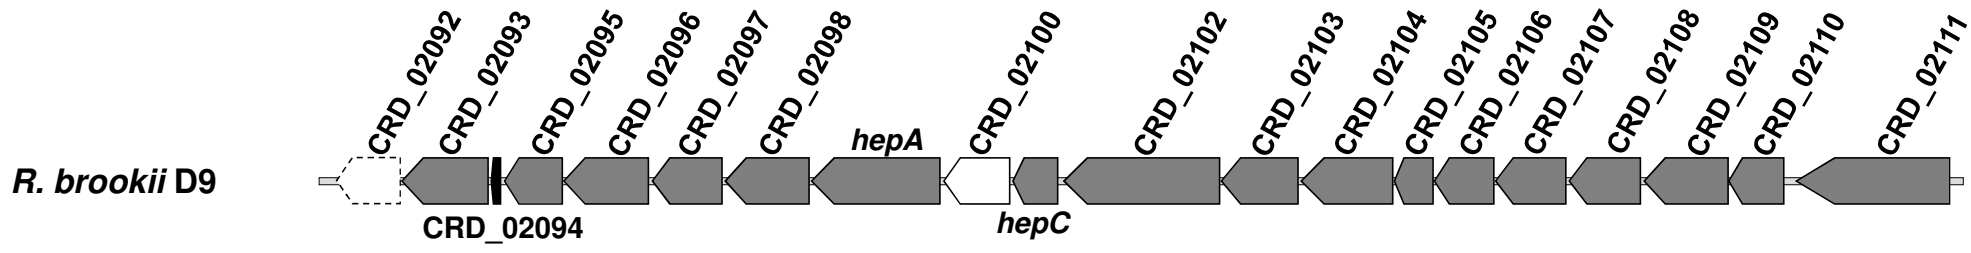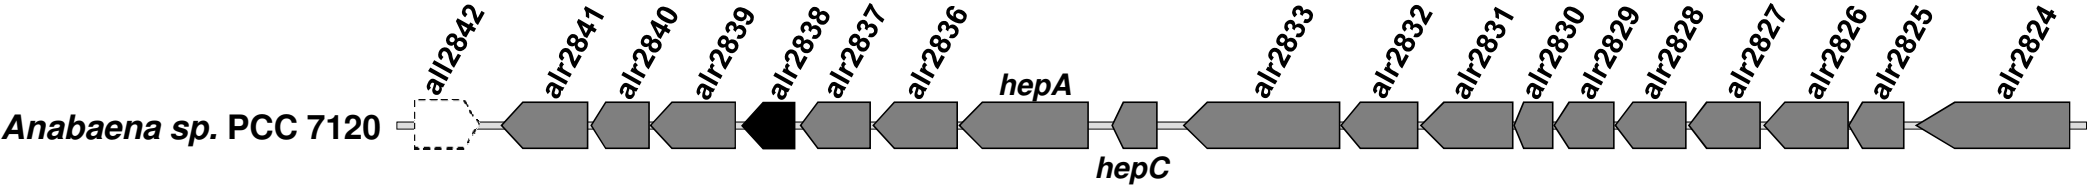

-  Similar genes between *Anabaena* sp. PCC 7120, CS-505 and D9
-  Unique gene in each species
-  Gene present only in CS-505 and D9
-  Genes outside of the synteny region
