# Supplementary material for: The Smallest Known Genomes of Multicellular and Toxic Cyanobacteria: Comparison, Minimal Gene Sets for Linked Traits and the Evolutionary Implications
Source: PubMed Central journal article supplement (PMC2821919; doi:10.1371/journal.pone.0009235), 2010-02-16
Supplement: pone.0009235.s011.pdf [file pone.0009235.s011.pdf]

**Table S4:** 83 Previously described regulatory genes present in the genomes of the terminal heterocyst forming cyanobacteria *C. raciborskii* CS-505 and the non-heterocystous *R. brookii* D9.

| <i>Anabaena</i><br>PCC 7120 | Gene                           | <i>C. raciborskii</i><br>CS-505 | Identity<br>(%) | <i>R. brookii</i><br>D9 | Identity<br>(%) | Described function/role                              |
|-----------------------------|--------------------------------|---------------------------------|-----------------|-------------------------|-----------------|------------------------------------------------------|
| all1940                     | <i>abp1</i>                    | CRC_02963                       | 76.30           | CRD_02427               | 77.77           | Heterocyst glycolipid-layer formation [1]            |
| all1939                     | <i>abp2</i>                    | CRC_02964                       | 72.69           | CRD_02426               | 72.89           |                                                      |
| alr3608                     | <i>abp3</i>                    | CRC_00830                       | 56.18           | -                       | -               |                                                      |
| alr4240                     | <i>abp4</i><br>( <i>hlyD</i> ) | CRC_02581                       | 65.90           | CRD_01244               | 64.24           |                                                      |
| alr1010                     | <i>ccbP</i>                    | -                               | -               | -                       | -               | Heterocyst differentiation [2]                       |
| all0601                     | <i>cnaT</i>                    | CRC_01748                       | 65.60           | CRD_01497               | 64.45           | <i>Nir</i> operon transcriptional regulator [3]      |
| all0187                     | <i>conR</i>                    | CRC_00948                       | 62.62           | CRD_02925               | 62.46           | Heterocyst functionality [4]                         |
| alr3712                     | <i>devA</i>                    | CRC_00436                       | 80.70           | -                       | -               | Heterocyst polysaccharide formation [5-8]            |
| alr3710                     | <i>devB</i>                    | CRC_00438                       | 65.32           | -                       | -               |                                                      |
| alr3711                     | <i>devC</i>                    | CRC_00437                       | 77.74           | -                       | -               |                                                      |
| alr3952                     | <i>devH</i>                    | CRC_03275                       | 98.32           | CRD_01596               | 98.32           |                                                      |
| alr0442                     | <i>devRa</i>                   | CRC_02562                       | 83.72           | CRD_01268               | 79.84           |                                                      |
| all1430                     | <i>fdxH</i> †                  | CRC_02876                       | 70.40           | -                       | -               | Heterocyst ferredoxin [9]                            |
| alr3858                     | <i>ftsZ</i>                    | CRC_03281                       | 86.34           | CRD_01589               | 86.41           | Septum formation during cell division [10]           |
| all1691                     | <i>furA</i>                    | CRC_01433                       | 88.07           | CRD_00658               | 88.74           | Iron metabolism regulation [11]                      |
| all2319                     | <i>glnB</i>                    | CRC_02206                       | 92.85           | CRD_00313               | 93.75           | N <sub>2</sub> metabolism regulation [12]            |
| asr3935                     | <i>hanA</i>                    | CRC_01160                       | 92.47           | CRD_00595               | 90.32           | Heterocyst differentiation [13]                      |
| alr0093                     | <i>hcwA</i>                    | -                               | -               | -                       | -               | Heterocyst polysaccharide and envelope formation [4] |
| alr1086                     | <i>henR</i>                    | CRC_00384                       | 69.04           | CRD_03033               | 68.51           |                                                      |
| alr2835                     | <i>hepA</i> †                  | CRC_01570                       | 57.19           | CRD_02099               | 56.09           |                                                      |
| alr3698                     | <i>hepB</i>                    | CRC_03468                       | 67.94           | CRD_01842               | 68.46           |                                                      |
| alr2834                     | <i>hepC</i>                    | CRC_01572                       | 41.50           | CRD_02101               | 43.19           |                                                      |
| all4496                     | <i>hepK</i>                    | -                               | -               | -                       | -               |                                                      |
| alr0117                     | <i>hepN</i>                    | CRC_00406                       | 48.58           | CRD_01826               | 47.33           |                                                      |
| all2760                     | <i>hepS</i>                    | -                               | -               | -                       | -               |                                                      |

|         |                                  |           |       |           |       |                                                                                |
|---------|----------------------------------|-----------|-------|-----------|-------|--------------------------------------------------------------------------------|
| alr2817 | <i>hetC</i>                      | -         | -     | -         | -     | Required for pro-heterocyst cell division cessation[14]                        |
| alr3546 | <i>hetF</i>                      | CRC_02207 | 52.46 | CRD_00315 | 58.04 | Heterocyst differentiation [15,16]                                             |
| all3740 | <i>hetL</i>                      | -         | -     | -         | -     |                                                                                |
| alr5357 | <i>hetM</i> †<br>( <i>hglB</i> ) | CRC_02052 | 65.60 | -         | -     | Heterocyst glycolipid-layer formation [17]                                     |
| alr5358 | <i>hetN</i>                      | -         | -     | -         | -     | Late stage heterocyst pattern maintenance [18]                                 |
| alr2818 | <i>hetP</i>                      | CRC_01587 | 58.11 | -         | -     | Heterocyst differentiation and maturation[19-22]                               |
| alr3234 | <i>hetP-like</i>                 | CRC_00980 | 69.33 | CRD_00495 | 69.33 |                                                                                |
| alr3234 | <i>hetP-like</i>                 | CRC_02972 | 41.26 | -         | -     |                                                                                |
| alr2902 | <i>hetP-like</i>                 | CRC_01674 | 61.19 | CRD_02196 | 62.68 |                                                                                |
| alr2339 | <i>hetR</i> †                    | CRC_03184 | 83.94 | CRD_01519 | 82.94 |                                                                                |
| alr2300 | <i>hetY</i>                      | CRC_02119 | 65.94 | CRD_02372 | 64.74 |                                                                                |
| alr0099 | <i>hetZ</i>                      | CRC_02801 | 79.07 | CRD_02292 | 79.69 |                                                                                |
| all5359 | <i>hetI</i>                      | CRC_01556 | 51.96 | CRD_01379 | 53.27 | Heterocyst glycolipid-layer formation[23-26]                                   |
| all5345 | <i>hgdA</i>                      | CRC_02043 | 69.23 | -         | -     |                                                                                |
| all5347 | <i>hgdB</i>                      | CRC_02045 | 63.93 | CRD_00126 | 48    |                                                                                |
| all5346 | <i>hgdC</i>                      | CRC_02044 | 82.39 | CRD_00127 | 61.47 |                                                                                |
| alr5356 | <i>hglA</i>                      | CRC_02051 | 81.40 | CRD_00121 | 75.62 |                                                                                |
| alr5355 | <i>hglC</i>                      | CRC_02050 | 61.19 | -         | -     |                                                                                |
| alr5354 | <i>hglD</i>                      | CRC_02049 | 71.49 | -         | -     |                                                                                |
| alr5351 | <i>hglE<sub>A</sub></i>          | CRC_02047 | 65.96 | -         | -     |                                                                                |
| all1646 | <i>hglE<sub>2</sub></i>          | -         | -     | -         | -     |                                                                                |
| alr5352 | <i>hglF</i>                      | -         | -     | -         | -     |                                                                                |
| alr5353 | <i>hglG</i>                      | CRC_02048 | 64    | -         | -     |                                                                                |
| all0813 | <i>hglK</i>                      | CRC_00692 | 54.93 | CRD_01636 | 54.24 |                                                                                |
| asr4517 | <i>nblA</i>                      | CRC_02186 | 82.25 | CRD_00293 | 80.64 | Phycobiliprotein degradation [27]                                              |
| all4312 | <i>nrrA</i>                      | CRC_00297 | 86.43 | CRD_01945 | 85.27 | Transcriptional regulator of <i>hetR</i> [28]                                  |
| alr4392 | <i>ntcA</i> †                    | CRC_00858 | 96.80 | CRD_00550 | 91.94 | N <sub>2</sub> metabolism and heterocyst differentiation regulators<br>[29,30] |
| all0602 | <i>ntcB</i>                      | CRC_01749 | 77.59 | CRD_01496 | 77.27 |                                                                                |
| all0521 | <i>patA</i> †                    | CRC_01956 | 40.15 | -         | -     | Heterocyst differentiation and initial pattern formation                       |
| all2512 | <i>patB</i>                      | CRC_01763 | 73.48 | -         | -     |                                                                                |

|         |              |           |       |           |       |                                                   |
|---------|--------------|-----------|-------|-----------|-------|---------------------------------------------------|
| alr4812 | <i>patN</i>  | CRC_03501 | 60.64 | CRD_01874 | 61.11 | [22,31-34]                                        |
| asl2301 | <i>patS</i>  | CRC_02157 | 29*   | CRD_02133 | 23*   |                                                   |
| asr0101 | <i>patU3</i> | CRC_02800 | 51.76 | CRD_02293 | 56.20 |                                                   |
| alr2502 | <i>pkn22</i> | -         | -     | -         | -     | NtcA mediated iron metabolism regulation [35,36]  |
| alr0709 | <i>pkn41</i> | -         | -     | -         | -     |                                                   |
| alr0710 | <i>pkn42</i> | -         | -     | -         | -     |                                                   |
| alr4366 | <i>pknA</i>  | -         | -     | -         | -     |                                                   |
| alr4368 | <i>pknD</i>  | CRC_02958 | 50.49 | CRD_00759 | 47    | Heterocyst differentiation [37]                   |
| alr3732 | <i>pknE</i>  | -         | -     | -         | -     | N <sub>2</sub> regulation [38]                    |
| alr3731 | <i>prpA</i>  | -         | -     | -         | -     | Heterocyst maturation [38,39]                     |
| all1731 | <i>prpJ</i>  | CRC_01339 | 55.29 | CRD_02900 | 53.52 |                                                   |
| alr4516 | <i>prpS</i>  | CRC_02187 | 68.46 | CRD_00294 | 61.95 | Modification of PII (GlnB) [12]                   |
| all1692 | <i>sigC</i>  | CRC_01434 | 79.21 | CRD_00657 | 78.60 | Transcriptional Regulators [40]                   |
| alr3800 | <i>sigE</i>  | CRC_02165 | 83.48 | CRD_00081 | 84.40 |                                                   |
| alr3280 | <i>sigG</i>  | CRC_00607 | 87.09 | CRD_02710 | 86.23 |                                                   |
| asr1734 | NA           | CRC_01342 | 87.09 | CRD_02898 | 84.94 | Heterocyst development inhibitor [41]             |
| all5343 | NA           | CRC_02041 | 55.84 | -         | -     | Heterocyst glycolipid-layer formation [23]        |
| alr5348 | NA           | -         | -     | -         | -     |                                                   |
| asr5349 | NA           | -         | -     | -         | -     |                                                   |
| alr2825 | NA           | CRC_01582 | 89.10 | CRD_02110 | 89.10 | Heterocyst polysaccharide envelope formation [42] |
| alr2827 | NA           | CRC_01580 | 87.64 | CRD_02108 | 86.09 |                                                   |
| alr2831 | NA           | CRC_01575 | 79.44 | CRD_02104 | 79.21 |                                                   |
| alr2833 | NA           | CRC_01573 | 70.88 | CRD_02102 | 70.08 |                                                   |
| alr2837 | NA           | CRC_01568 | 54.76 | CRD_02097 | 54.76 |                                                   |
| alr2839 | NA           | CRC_01567 | 62.46 | CRD_02096 | 62.72 |                                                   |
| alr2841 | NA           | CRC_01565 | 49.77 | CRD_02093 | 49.51 |                                                   |

\* To assign the corresponding CDS as a *patS* homologue other features than amino-acid sequence identity were considered (see text). NA, not assigned.

† Expression confirmed by qPCR.

1. Koksharova OA, Wolk CP (2002) Novel DNA-Binding Proteins in the Cyanobacterium *Anabaena* sp. Strain PCC 7120. *J Bacteriol* 184: 3931-3940.
2. Zhao YH, Shi YM, Zhao WX, Huang X, Wang DH, et al. (2005) CcbP, a calcium-binding protein from *Anabaena* sp PCC 7120 provides evidence that calcium ions regulate heterocyst differentiation. *Proc Natl Acad Sci U S A* 102: 5744-5748.
3. Frias JE, Herrero A, Flores E (2003) Open Reading Frame all0601 from *Anabaena* sp. Strain PCC 7120 Represents a Novel Gene, *cnaT*, Required for Expression of the Nitrate Assimilation *nir* Operon. *J Bacteriol* 185: 5037-5044.
4. Fan Q, Lechno-Yossef S, Ehira S, Kaneko T, Ohmori M, et al. (2006) Signal Transduction Genes Required for Heterocyst Maturation in *Anabaena* sp. Strain PCC 7120. *J Bacteriol* 188: 6688-6693.
5. Cai Y, Wolk CP (1997) *Anabaena* sp. strain PCC 7120 responds to nitrogen deprivation with a cascade-like sequence of transcriptional activations. *J Bacteriol* 179: 267-271.
6. Fiedler G, Arnold M, Hannus S, Maldener I (1998) The DevBCA exporter is essential for envelope formation in heterocysts of the cyanobacterium *Anabaena* sp. strain PCC 7120. *Mol Microbiol* 27: 1193-1202.
7. Ramirez ME, Hebbar PB, Zhou RB, Wolk CP, Curtis SE (2005) *Anabaena* sp strain PCC 7120 gene *devH* is required for synthesis of the heterocyst glycolipid layer. *J Bacteriol* 187: 2326-2331.
8. Campbell EL, Hagen KD, Cohen MF, Summers ML, Meeks JC (1996) The *devR* gene product is characteristic of receivers of two-component regulatory systems and is essential for heterocyst development in the filamentous Cyanobacterium *Nostoc* sp strain ATCC 29133. *J Bacteriol* 178: 2037-2043.
9. Schrautemeier B, Böhme H (1985) A distinct ferredoxin for nitrogen fixation isolated from heterocysts of the cyanobacterium *Anabaena variabilis*. *FEBS Letters* 184: 304-308.
10. Sakr S, Jeanjean R, Zhang CC, Arcondeguy T (2006) Inhibition of cell division suppresses heterocyst development in *Anabaena* sp strain PCC 7120. *J Bacteriol* 188: 1396-1404.

11. Lopez-Gomollon S, Hernandez JA, Wolk CP, Peleato ML, Fillat MF (2007) Expression of *furA* is modulated by NtcA and strongly enhanced in heterocysts of *Anabaena* sp PCC 7120. *Microbiology-Sgm* 153: 42-50.
12. Laurent S, Forchhammer K, Gonzalez L, Heulin T, Zhang CC, et al. (2004) Cell-type specific modification of PII is involved in the regulation of nitrogen metabolism in the cyanobacterium *Anabaena* PCC 7120. *FEBS Lett* 576: 261-265.
13. Khudyakov I, Wolk CP (1996) Evidence that the *hanA* gene coding for HU protein is essential for heterocyst differentiation in, and cyanophage A-4(L) sensitivity of, *Anabaena* sp strain PCC 7120. *J Bacteriol* 178: 3572-3577.
14. Xu X, Wolk CP (2001) Role for *hetC* in the transition to a nondividing state during heterocyst differentiation in *Anabaena* sp. *J Bacteriol* 183: 393-396.
15. Wong FCY, Meeks JC (2001) The *hetF* gene product is essential to heterocyst differentiation and affects HetR function in the cyanobacterium *Nostoc punctiforme*. *J Bacteriol* 183: 2654-2661.
16. Liu DA, Golden JW (2002) *hetL* overexpression stimulates heterocyst formation in *Anabaena* sp. strain PCC 7120. *J Bacteriol* 184: 6873-6881.
17. Maldener I, Hannus S, Kammerer M (2003) Description of five mutants of the cyanobacterium *Anabaena* sp strain PCC 7120 affected in heterocyst differentiation and identification of the transposon-tagged genes. *FEMS Microbiol Lett* 224: 205-213.
18. Callahan SM, Buikema WJ (2001) The role of HetN in maintenance of the heterocyst pattern in *Anabaena* sp. PCC 7120. *Mol Microbiol* 40: 941-950.
19. Fernandez-Pinas F, Leganes F, Wolk CP (1994) A third genetic locus required for the formation of heterocysts in *Anabaena* sp. strain PCC 7120. *J Bacteriol* 176: 5277-5283.
20. Buikema WJ, Haselkorn R (1991) Characterization of a gene controlling heterocyst differentiation in the cyanobacterium *Anabaena* 7120. *Genes Dev* 5: 321-330.
21. Yoon HS, Lee MH, Xiong J, Golden JW (2003) *Anabaena* sp strain PCC 7120 *hetY* gene influences heterocyst development. *J Bacteriol* 185: 6995-7000.

22. Zhang W, Du Y, Khudyakov I, Fan Q, Gao H, et al. (2007) A gene cluster that regulates both heterocyst differentiation and pattern formation in *Anabaena* sp strain PCC 7120. *Mol Microbiol* 66: 1429-1443.
23. Fan Q, Huang G, Lechno-Yossef S, Wolk CP, Kaneko T, et al. (2005) Clustered genes required for synthesis and deposition of envelope glycolipids in *Anabaena* sp. strain PCC 7120. *Mol Microbiol* 58: 227-243.
24. Black K, Buikema WJ, Haselkorn R (1995) The *hglK* gene is required for localization of heterocyst-specific glycolipids in the cyanobacterium *Anabaena* sp. strain PCC 7120. *J Bacteriol* 177: 6440-6448.
25. Bauer CC, Ramaswamy KS, Endley S, Scappino LA, Golden JW, et al. (1997) Suppression of heterocyst differentiation in *Anabaena* PCC 7120 by a cosmid carrying wild-type genes encoding enzymes for fatty acid synthesis. *FEMS Microbiol Lett* 151: 23-30.
26. Campbell EL, Cohen MF, Meeks JC (1997) A polyketide-synthase-like gene is involved in the synthesis of heterocyst glycolipids in *Nostoc punctiforme* strain ATCC 29133. *Arch Microbiol* 167: 251-258.
27. Baier K, Lehmann H, Stephan DP, Lockau W (2004) NblA is essential for phycobilisome degradation in *Anabaena* sp strain PCC 7120 but not for development of functional heterocysts. *Microbiology-Sgm* 150: 2739-2749.
28. Ehira S, Ohmori M (2006) NrrA, a nitrogen-responsive response regulator facilitates heterocyst development in the cyanobacterium *Anabaena* sp strain PCC 7120. *Mol Microbiol* 59: 1692-1703.
29. Wei TF, Ramasubramanian TS, Golden JW (1994) *Anabaena* sp. strain PCC 7120 *ntcA* gene required for growth on nitrate and heterocyst development. *J Bacteriol* 176: 4473-4482.
30. Frias JE, Flores E, Herrero A (2000) Activation of the *Anabaena nir* operon promoter requires both NtcA (CAP family) and NtcB (LysR family) transcription factors. *Mol Microbiol* 38: 613-625.
31. Liang J, Scappino L, Haselkorn R (1992) The *patA* gene-product, which contains a region similar to CheY of *Escherichia coli*, controls heterocyst pattern-formation in the cyanobacterium *Anabaena* 7120. *Proc Natl Acad Sci U S A* 89: 5655-5659.
32. Jones KM, Buikema WJ, Haselkorn R (2003) Heterocyst-Specific Expression of *patB*, a Gene Required for Nitrogen Fixation in *Anabaena* sp. Strain PCC 7120. *J Bacteriol* 185: 2306-2314.

33. Meeks JC, Elhai J (2002) Regulation of cellular differentiation in filamentous cyanobacteria in free-living and plant-associated symbiotic growth states. *Microbiol Mol Biol Rev* 66: 94-121.
34. Yoon HS, Golden JW (1998) Heterocyst pattern formation controlled by a diffusible peptide. *Science* 282: 935-938.
35. Cheng Y, Li JH, Shi L, Wang L, Latifi A, et al. (2006) A pair of iron-responsive genes encoding protein kinases with a Ser/Thr kinase domain and a His kinase domain are regulated by NtcA in the cyanobacterium *Anabaena* sp strain PCC 7120. *J Bacteriol* 188: 4822-4829.
36. Xu WL, Jeanjean R, Liu YD, Zhang CC (2003) *pkn22* (alr2502) encoding a putative Ser/Thr kinase in the cyanobacterium *Anabaena* sp PCC 7120 is induced by both iron starvation and oxidative stress and regulates the expression of *isiA*. *FEBS Lett* 553: 179-182.
37. Zhang CC (1993) A gene encoding a protein related to eukaryotic protein kinases from the filamentous heterocystous cyanobacterium *Anabaena* PCC 7120. *Proc Natl Acad Sci U S A* 90: 11840-11844.
38. Zhang CC, Libs L (1998) Cloning and characterisation of the *pknD* gene encoding an eukaryotic-type protein kinase in the cyanobacterium *Anabaena* sp. PCC7120. *Mol Gen Genet* 258: 26-33.
39. Jang JC, Wang L, Jeanjean R, Zhang CC (2007) PrpJ, a PP2C-type protein phosphatase located on the plasma membrane, is involved in heterocyst maturation in the cyanobacterium *Anabaena* sp PCC 7120. *Mol Microbiol* 64: 347-358.
40. Aldea MR, Mella-Herrera RA, Golden JW (2007) Sigma Factor Genes *sigC*, *sigE*, and *sigG* are Upregulated in Heterocysts of the Cyanobacterium *Anabaena* sp. Strain PCC 7120. *J Bacteriol* 189: 8392-8396.
41. Wu XQ, Lee DW, Mella RA, Golden JW (2007) The *Anabaena* sp strain PCC 7120 *asr1734* gene encodes a negative regulator of heterocyst development. *Mol Microbiol* 64: 782-794.
42. Huang G, Fan Q, Lechno-Yossef S, Wojciuch E, Wolk CP, et al. (2005) Clustered genes required for the synthesis of heterocyst envelope polysaccharide in *Anabaena* sp. strain PCC 7120. *J Bacteriol* 187: 1114-1123.
