# Supplementary material for: The Smallest Known Genomes of Multicellular and Toxic Cyanobacteria: Comparison, Minimal Gene Sets for Linked Traits and the Evolutionary Implications
Source: PLoS One. 2010 Feb 16;5(2):e9235. doi: 10.1371/journal.pone.0009235 (PMC2821919; doi:10.1371/journal.pone.0009235)
Supplement: Table S2 — Cell division genes in cyanobacteria (0.02 MB XLS) [file pone.0009235.s009.xls]

## Sheet: Supplementary table 2
Cell division genes in cyanobacteria.
	CS-505		D9
Name	Locus tag	% identity AA	Locus tag	% identity AA	Product / Description
ftsW°	CRC_02478	77.14	CRD_02755	76.88	Cell cycle protein
ftsZ°	CRC_03281	87.56	CRD_01589	86.42	Cell division protein FtsZ
ftn2*	CRC_01266	59.25	CRD_01988	56.73	Heat shock protein DnaJ-like
cikA*	CRC_01431	67.4	CRD_00661	69.02	Multi-sensor Signal Transduction Histidine Kinase
ftsI°	CRC_03074	64.9	CRD_01146	64.13	Penicillin-binding protein, transpeptidase
cdv1*	CRC_02542	69.7	CRD_01024	69.7	Peptidyl-prolyl cis-trans isomerase, cyclophilin type
cdv2(ylmF)*	CRC_03484	81.35	CRD_01858	82.38	Protein of unknown function DUF552
ylmE+	CRC_03485	70.27	CRD_01859	70.72	Protein of unknown function UPF0001
ylmG+	CRC_00226	70.65	CRD_01524	70.65	Protein of unknown function YGGT
ylmH+	CRC_00425	85.71	CRD_02533	85.71	RNA-binding S4
minC°	CRC_03004	60.7	CRD_00104	60.4	Septum formation inhibitor MinC
minE°	CRC_03006	72.53	CRD_00106	70.1	Septum formation topological specificity factor MinE
minD°	CRC_03005	84.53	CRD_00105	86.04	Septum site-determining protein MinD
ftsQ°	CRC_03280	54.24	CRD_01590	54.24	cell division protein FtsQ
cdv3(divIVA)*	CRC_00206	72.55	CRD_02623	72.22	conserved hypothetical protein
yfhF2°	CRC_01074	59.44	CRD_02634	59.18	conserved hypothetical protein
ftn6*	CRC_02893	46.46	CRD_02832	45.1	conserved hypothetical protein
Similaritiy precentages are based on comparison with the orthologs in Anabaena sp. PCC 7120
* Identified cell division genes in Synechochoccus elongatus PCC 7942
+ Candidate cell division genes in S. elongatus PCC 7942
° Genes described in E. coli (1) and B. subtillis (2) responsible for cell division
